# Supplementary material for: Mef2s are required for thick filament formation in nascent muscle fibres
Source: Oxford University Press journal article supplement (doi:10.1242/dev.007088), 2007-05-31
Supplement: dev007088tables1.pdf [file dev007088tables1.pdf]

| Figure number and panel | Con            | <i>mef2dic</i> MO | <i>mef2cd</i> MO | <i>mef2c</i> MO | <i>mef2d</i> MO | <i>mef2c</i> MO+ <i>mef2d</i> MO | <i>hoo</i> <sup>hmo213</sup> × <i>hoo</i> <sup>hmo213</sup> | <i>hoo</i> <sup>hmo213</sup> × <i>hoo</i> <sup>hmo214</sup> + <i>mef2d</i> MO |
|-------------------------|----------------|-------------------|------------------|-----------------|-----------------|----------------------------------|-------------------------------------------------------------|-------------------------------------------------------------------------------|
| 2A                      | 0/1178 (0%)    | 894/976 (92%)     | 298/325 (92%)    | 3/162 (2%)      | 15/204 (7%)     | 86/122 (70%)                     | 0/369 (0%)                                                  | 112/159 (70%)                                                                 |
| 2C                      | 0/38 (0%)      | 45/47 (96%)       |                  |                 |                 |                                  |                                                             |                                                                               |
| 2D                      | 35/35 (100%)   | 19/19 (100%)      |                  |                 |                 |                                  |                                                             |                                                                               |
| 2C,D, 3C-E, 6A, S1F, S3 | 0/290 (0%)     | 370/396 (93%)     | 166/181 (92%)    | 0/83 (0%)       | 6/66 (9%)       | 65/102 (64%)                     | 0/161 (0%)                                                  | 71/114 (62%)                                                                  |
| 2F                      | 25/25 (100%)   | 28/28 (100%)      |                  |                 |                 |                                  |                                                             |                                                                               |
| 2H                      | 8/77 (10%)     | 112/120 (93%)     |                  |                 |                 |                                  |                                                             |                                                                               |
| 3A                      | 73/73 (100%)   | 60/60 (100%)      |                  |                 |                 |                                  |                                                             |                                                                               |
| 3B                      | 78/78 (100%)   | 77/77 (100%)      | 19/19 (100%)     | 20/20 (100%)    | 21/21 (100%)    | 15/15 (100%)                     |                                                             |                                                                               |
| 3F                      | 0/22 (0%)      | 30/31 (97%)       |                  |                 |                 |                                  |                                                             |                                                                               |
| 3G                      | 0/173 (0%)     | 70/74 (95%)       |                  |                 |                 |                                  |                                                             |                                                                               |
| 5A                      | 29/29 (100%)   | 25/25 (100%)      |                  |                 |                 |                                  |                                                             |                                                                               |
| 5B, S4A                 | 0/135 (0%)     | 214/222 (96%)     |                  | 0/18 (0%)       | 1/22 (5%)       | 22/24 (92%)                      |                                                             |                                                                               |
| 5C                      | 0/65 (0%)      | 40/40 (100%)      |                  |                 |                 |                                  |                                                             |                                                                               |
| 5D                      | 0/38 (0%)      | 35/41 (85%)       |                  |                 |                 |                                  |                                                             |                                                                               |
| 5E                      | 103/103 (100%) | 35/35 (100%)      |                  |                 |                 |                                  |                                                             |                                                                               |
| 5F                      | 61/61 (100%)   | 54/54 (100%)      |                  |                 |                 |                                  |                                                             |                                                                               |
| 5G, S4C                 | 146/146 (100%) | 83/83 (100%)      | 26/26 (100%)     | 23/23 (100%)    | 24/24 (100%)    | 26/26 (100%)                     |                                                             |                                                                               |
| 5H                      | 22/22 (100%)   | 13/13 (100%)      |                  |                 |                 |                                  |                                                             |                                                                               |
| 6A                      | 0/20 (0%)      | 22/22 (100%)      |                  |                 |                 |                                  |                                                             |                                                                               |
| 6B,F                    | 0/12 (0%)      | 12/12 (100%)      |                  |                 |                 |                                  |                                                             |                                                                               |
| 6C                      | 0/10 (0%)      | 13/13 (100%)      |                  |                 |                 |                                  |                                                             |                                                                               |
| 6D                      | 0/18 (0%)      | 17/20 (85%)       |                  |                 |                 |                                  |                                                             |                                                                               |
| 6E,F                    | 0/17 (0%)      | 19/19 (100%)      |                  |                 |                 |                                  |                                                             |                                                                               |
| S1A                     | 42/42 (100%)   |                   |                  | 16/17 (94.1%)   | 0/17 (0%)       |                                  |                                                             |                                                                               |
| S1B                     | 30/30 (100%)   |                   |                  | 17/17 (100%)    | 0/12 (0%)       |                                  |                                                             |                                                                               |
| S1C                     | 30/30 (100%)   |                   |                  | 0/17 (0%)       | 12/12 (100%)    |                                  |                                                             |                                                                               |
| S1D (left)              | 39/39 (100%)   |                   |                  |                 | 39/39 (100%)    |                                  |                                                             |                                                                               |
| S1D (right)             | 19/19 (100%)   |                   |                  | 38/38 (100%)    |                 |                                  |                                                             |                                                                               |
| S1E,F, S3               | 0**/129 (0%)   | 192*/198 (96%)    | 29*/34 (85%)     | 0**/73 (0%)     | 6**/56 (11%)    | 40**/57 (70%)                    | 0**/83 (0%)                                                 | 10*/37 (27%) 21**/37 (57%)                                                    |
| S2A                     | 0/52 (0%)      |                   |                  |                 |                 |                                  |                                                             |                                                                               |
| S2B,C                   | 0**/57 (0%)    | 29*/36 (81%)      | 18*/23 (78%)     | 27*/27 (100%)   | 0**/22 (0%)     | 17*/20 (85%)                     | 13**/48 (27%) 23**/48 (48%)                                 | 5*/15 (33%) 6**/15 (40%)                                                      |
| S2D                     | 0/34 (0%)      |                   |                  | 0/27 (0%)       | 22/22 (100%)    | 17/20 (85%)                      |                                                             |                                                                               |
| S4B                     | 1**/32 (3%)    |                   |                  |                 | 0**/28 (0%)     |                                  | 1**/32 (3%)                                                 | 19**/64 (30%) 33**/64 (52%)                                                   |

Con, Control.

2A, Fraction of 24- to 28-hpf embryos with ventral curvature and motility defects.

2C, Fraction of embryos with co-localised slow and fast MyHC in slow fibres and absence or strong reduction of fast MyHC in fast fibres.

2D, Fraction of *Tg(acta1:GFP)* embryos with normal GFP.

2C-E, 3C-E, 6A, S1F, S3, Fraction of 22- to 26-hpf wild-type, *Tg(acta1:GFP)* or *myogenin:GFP*-injected embryos with immature slow fibres. See Fig. 3E for quantification of *hoo* mild and severe proportions.

2H, Fraction of 24-hpf embryos with upregulated *myogenin* mRNA expression in anterior somites.

3A,3B,2F, Fraction of 15s embryos with normal expression of all-MyHC, *smyhct1* and *myhz1*, respectively.

3F, Fraction of 15s embryos with upregulated adaxial *prdm1* mRNA expression in anterior somites.

5G, Fraction of 24s embryos without *eng2a* mRNA expression in slow or fast fibres.

5A, Fraction of 24-hpf embryos with normal or upregulated *smyhct1* mRNA in somites.

5B, S4A, Fraction of 24-hpf embryos with reduced levels of *myhz1* mRNA in somites.

5C, Fraction of 22s embryos with reduced levels of *mylz2* mRNA in somites.

5D, Fraction of 24-hpf embryos with abolished expression of *smbc* mRNA in somites.

5E, Fraction of 21s embryos with normal expression of *acta1* mRNA in somites.

5F, Fraction of 24-hpf embryos with normal or upregulated *tpm2* mRNA in somites.

S1A, Fraction of 18-stage embryos with adaxial Mef2 staining.

S1B, Fraction of 15s embryos showing PSM Mef2 staining.

S1C, Fraction of 15s embryos showing Mef2 staining in heart region nuclei.

S1D (left), Fraction of 13-15s embryos showing normal *mef2c* expression in somites and heart region.

S1D (right), Fraction of 13-15s embryos showing normal *mef2d* expression in somites.

S1E,F, S3, Fraction of 24-hpf embryos showing undetectable (\*) or low (\*\*) levels of Mef2 staining in skeletal fibre nuclei.

S2A, Fraction of 18-stage embryos showing Mef2c staining.

S2B,C, Fraction of 18-stage embryos showing undetectable (\*) or low (\*\*) levels of Mef2c staining in skeletal fibre nuclei.

S2D, Fraction of 24-hpf embryos showing undetectable levels of Mef2c staining in heart muscle nuclei.

S4B, Fraction of 22-24s embryos with highly reduced (\*) or reduced (\*\*) levels of *myhz1* mRNA in somites.
